# Supplementary material for: An Increase in Fat Mass Index Predicts a Deterioration of Running Speed
Source: PubMed Central journal article supplement (PMC6471649; doi:10.3390/nu11030701), 2019-03-25

## **SUPPLEMENTAL MATERIAL**

**Table S1:** Univariate linear mixed regression models for prediction of running speed

**Table S2:** Comparisons of multivariate linear mixed regression models

**Figure S1:** Flow-chart showing the selection of the included participants.

**Figure S2:** Predicted speed of each participant according to model 5 against age, according to the baseline body mass index [BMI; A], fat-free mass index [FMI; B] or fat mass index [FFMI; C]. Each body composition parameter was dichotomized, based on the median value at baseline. Median values for women and men were 21.9 and 24.1 kg/m<sup>2</sup> for BMI, 15.7 and 19.2 kg/m<sup>2</sup> for FFMI, and 6.3 and 4.9 kg/m<sup>2</sup> for FMI, respectively.

**Supplemental table 1: Univariate linear mixed regression models for prediction of running speed in women [377 participants, 1419 observations] and men [509 participants, 2161 observations]**

|                                          | Women     |             |             | p      | Men     |             |  | p      |
|------------------------------------------|-----------|-------------|-------------|--------|---------|-------------|--|--------|
|                                          | $\beta$   | 95% CI      |             |        | $\beta$ | 95% CI      |  |        |
| Age [years]                              |           |             |             | <0.001 |         |             |  | <0.001 |
|                                          | 15-24     | 0.00        |             |        | 0.00    |             |  |        |
|                                          | 25-34     | -0.23       | -0.51 0.06  |        | -0.17   | -0.46 0.11  |  |        |
|                                          | 35-44     | -0.31       | -0.63 0.01  |        | -0.24   | -0.55 0.08  |  |        |
|                                          | 45-54     | -0.61       | -0.94 -0.28 |        | -0.58   | -0.91 -0.25 |  |        |
|                                          | 55-64     | -1.10       | -1.45 -0.75 |        | -1.50   | -1.85 -1.15 |  |        |
|                                          | $\geq 65$ | -1.92       | -2.32 -1.52 |        | -2.92   | -3.31 -2.53 |  |        |
| Body mass index [kg/m <sup>2</sup> ]     | -0.23     | -0.27 -0.20 |             | <0.001 | -0.41   | -0.45 -0.37 |  | <0.001 |
| Fat-free mass index [kg/m <sup>2</sup> ] | -0.07     | -0.14 -0.01 |             | 0.059  | -0.20   | -0.26 -0.14 |  | <0.001 |
| Fat mass index [kg/m <sup>2</sup> ]      | -0.34     | -0.39 -0.29 |             | <0.001 | -0.50   | -0.54 -0.45 |  | <0.001 |
| Year of measurement [yrs]                |           |             |             | <0.001 |         |             |  | <0.001 |
|                                          | 1999-2001 | 0.00        |             |        | 0.00    |             |  |        |
|                                          | 2002-2004 | -0.01       | -0.12 0.12  |        | -0.26   | -0.38 -0.13 |  |        |
|                                          | 2005-2007 | -0.19       | -0.32 -0.06 |        | -0.48   | -0.62 -0.35 |  |        |
|                                          | 2008-2010 | -0.27       | -0.41 -0.12 |        | -0.73   | -0.87 -0.60 |  |        |
|                                          | 2011-2013 | -0.78       | -0.93 -0.63 |        | -1.43   | -1.57 -1.28 |  |        |
|                                          | 2014-2016 | -0.81       | -0.96 -0.64 |        | -1.49   | -1.64 -1.33 |  |        |
| Temperature [°C]                         | -0.01     | -0.02 0.01  |             | 0.267  | 0.01    | 0.01 0.02   |  | 0.017  |
| Relative humidity [%]                    | 0.01      | 0.01 0.02   |             | <0.001 | 0.02    | 0.02 0.03   |  | <0.001 |

**Supplemental table 2: Comparisons of linear mixed regression models**

|                                         | Model 1 | Model 2             | Model 3             | Model 4             | Model 5                   |
|-----------------------------------------|---------|---------------------|---------------------|---------------------|---------------------------|
| <b>Women [n=377, 1419 observations]</b> |         |                     |                     |                     |                           |
| Bayesian information criterion          | 3618.8  | 3501.1 <sup>a</sup> | 3624.1              | 3450.9 <sup>a</sup> | 3458.1 <sup>a, b</sup>    |
| <b>Men [n=509, 2161 observations]</b>   |         |                     |                     |                     |                           |
| Bayesian information criterion          | 6136.2  | 5794.1 <sup>a</sup> | 6115.2 <sup>a</sup> | 5800.8 <sup>a</sup> | 5755.6 <sup>a, b, c</sup> |

Model 1: categories of age, categories of year of measurement, temperature, relative humidity

Model 2: model 1 + body mass index

Model 3: model 1 + fat-free mass index

Model 4: model 1 + fat mass index

Model 5: model 1 + fat-free mass index + fat mass index

<sup>a</sup>p<0.001 [likelihood-ratio test] vs. model 1

<sup>b</sup>p<0.001 [likelihood-ratio test] vs. model 3

<sup>c</sup>p<0.001 [likelihood-ratio test] vs. model 4

## Supplemental figure 1

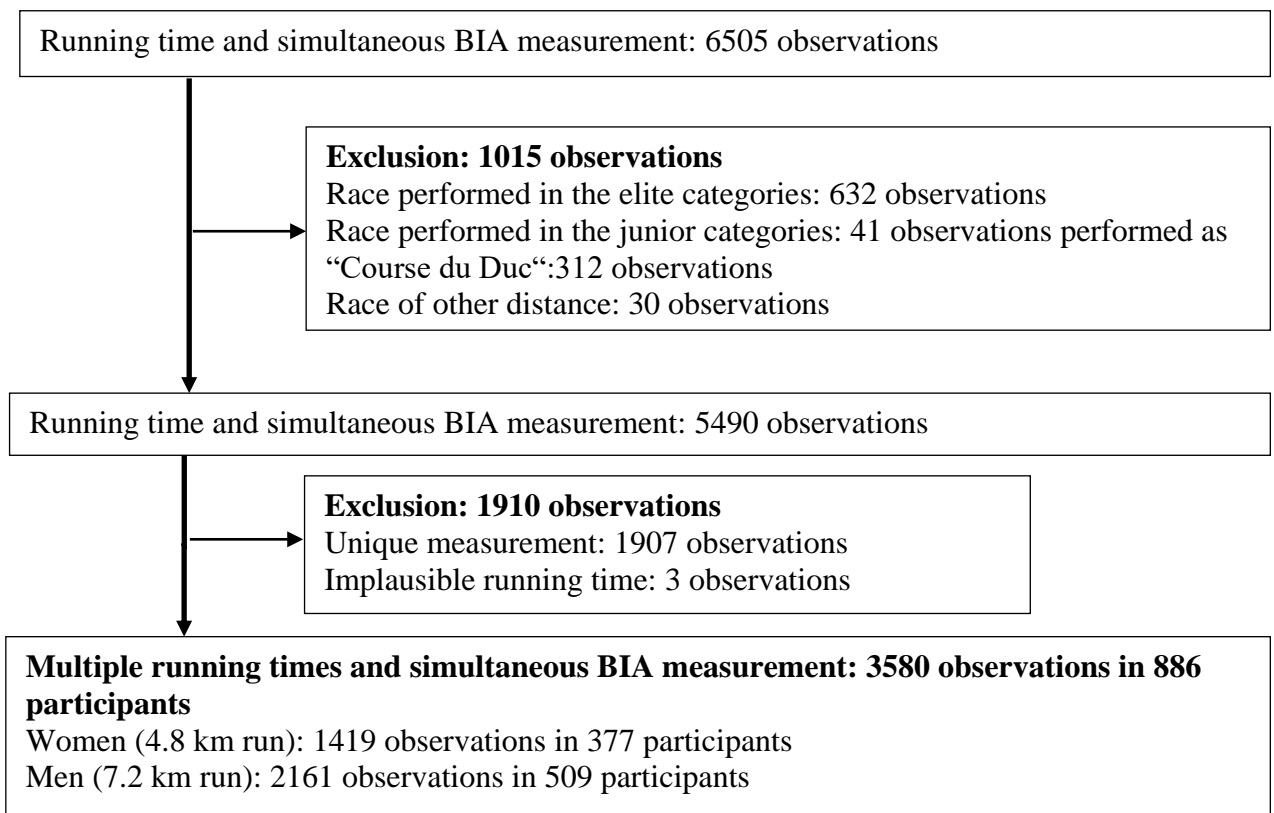

## Supplemental figure 2

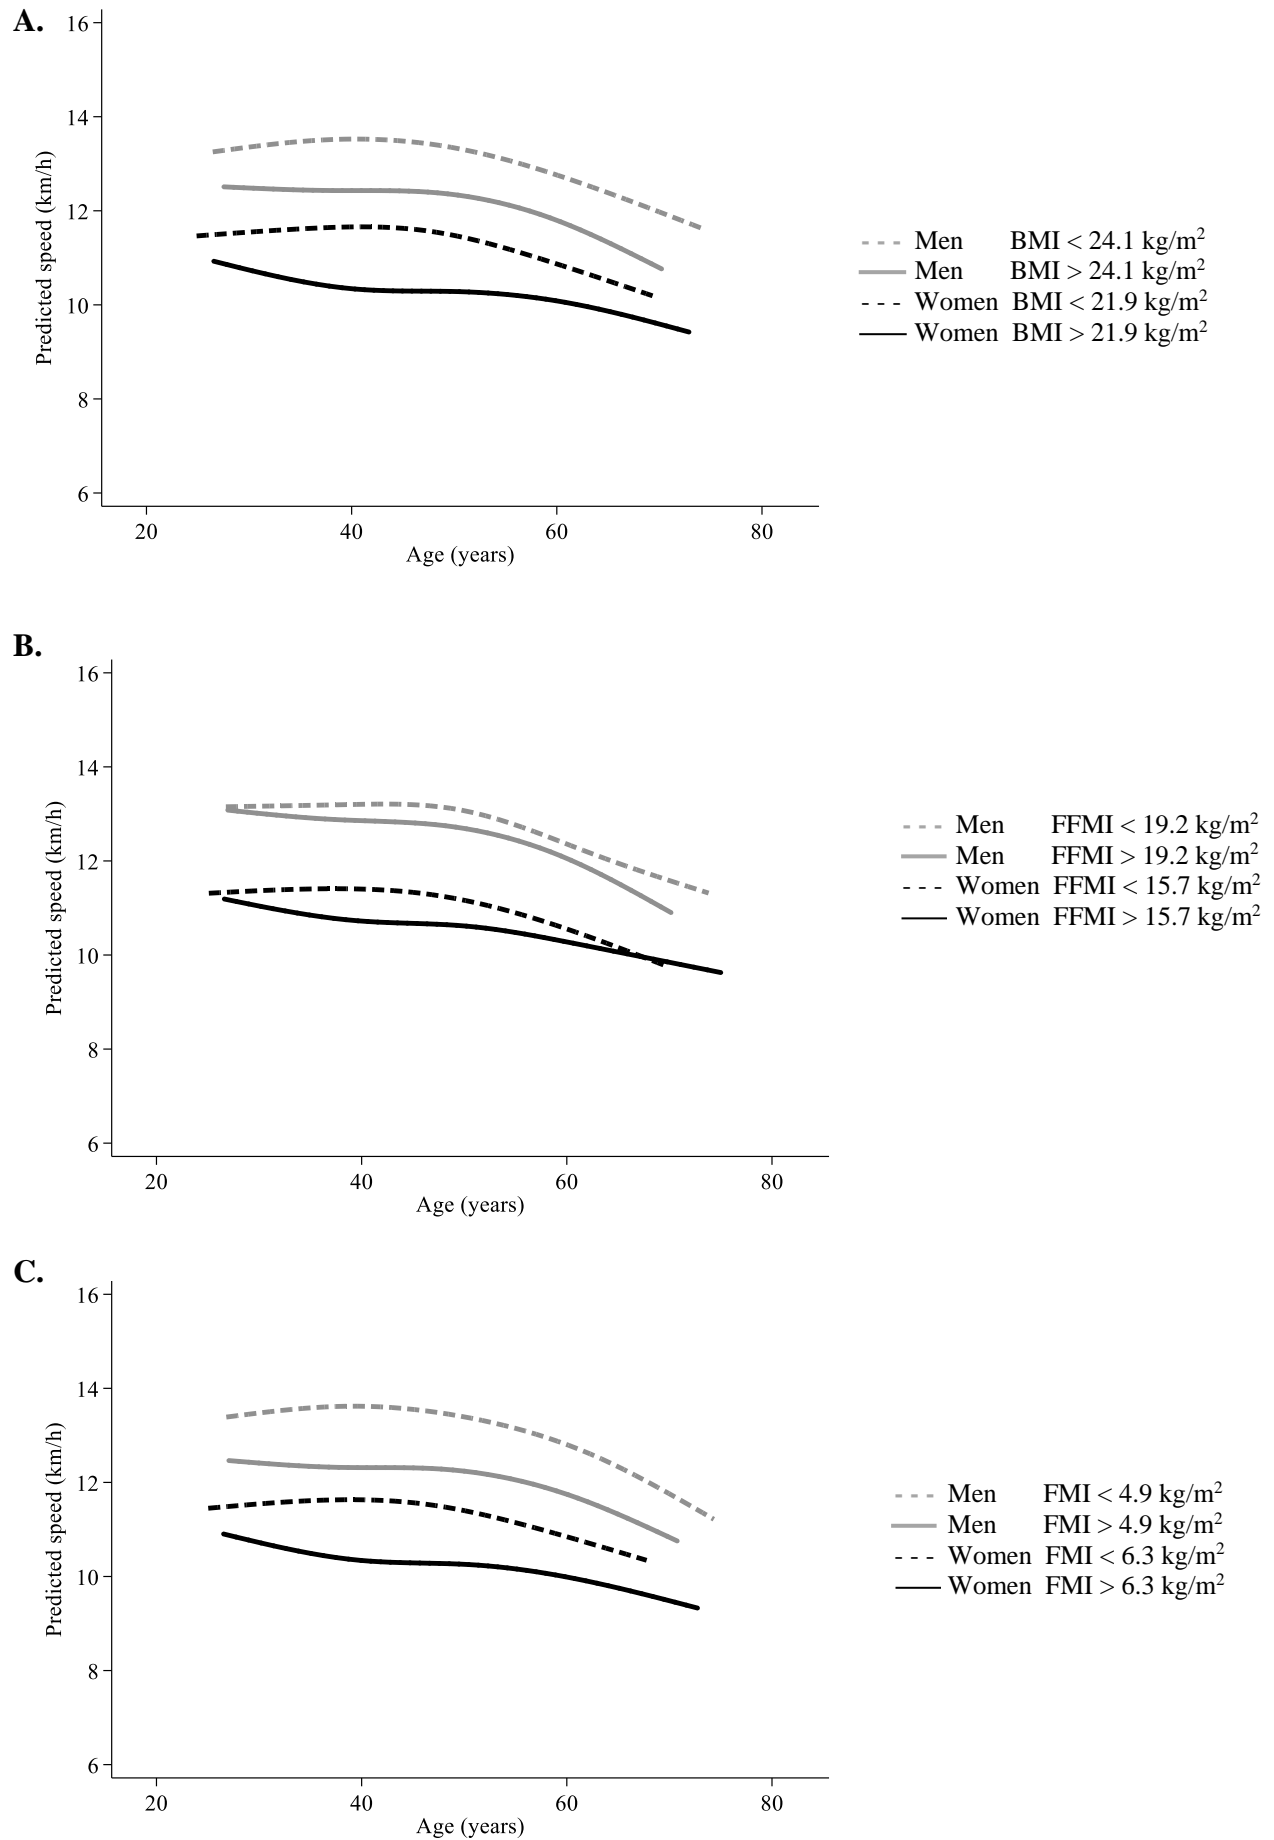

Supplement: nutrients-11-00701-s001.pdf [file nutrients-11-00701-s001.pdf]
